1 **Title: Hematopoietic stem cells differentiate into restricted myeloid progenitors before cell division**

2 **Authors:** Tatyana Grinenko<sup>1\*</sup>, Anne Eugster<sup>2</sup>, Lars Thielecke<sup>3</sup>, Beata Ramazs<sup>1</sup>, Anja Krueger<sup>1</sup>, Sevina  
3 Dietz<sup>2</sup>, Ingmar Glauche<sup>3</sup>, Alexander Gerbaulet<sup>4</sup>, Malte von Bonin<sup>5,6,7</sup>, Onur Basak<sup>8,9</sup>, Hans Clevers<sup>8,9,10</sup>,  
4 Triantafyllos Chavakis<sup>1,2</sup>, Ben Wielockx<sup>1,2\*</sup>

5  
6 **Affiliations:**

7 <sup>1</sup>Department of Clinical Pathobiochemistry, Institute for Clinical Chemistry and Laboratory Medicine,  
8 Technische Universität, Dresden, Germany.

9 <sup>2</sup>DFG Research Centre and Cluster of Excellence for Regenerative Therapies Dresden, Technische  
10 Universität Dresden, Germany,

11 <sup>3</sup>Institute for Medical Informatics and Biometry (IMB), Technische Universität Dresden, Germany.

12 <sup>4</sup>Institute for Immunology, Technische Universität, Dresden, Germany.

13 <sup>5</sup>Medical Clinic and Policlinic I, University Hospital Carl Gustav Carus, Technische Universität Dresden,  
14 Dresden, Germany.

15 <sup>6</sup>German Cancer Consortium (DKTK), partner site Dresden, Germany.

16 <sup>7</sup>German cancer research center (DKFZ), Heidelberg, Germany.

17 <sup>8</sup>Hubrecht Institute, Royal Netherlands Academy of Arts and Sciences and University Medical Center  
18 Utrecht, 3584 CT, Utrecht, the Netherlands.

19 <sup>9</sup>Cancer Genomics Netherlands, UMC Utrecht, 3584 GC, Utrecht, the Netherlands.

20 <sup>10</sup>Princess Máxima Centre, 3584 CT Utrecht, the Netherlands.

21

22 **\*Correspondence to:** tatyana.grinenko@uniklinikum-dresden.de, ben.wielockx@tu-dresden.de

## 23 **Summary**

24 Hematopoietic stem cells (HSCs) continuously replenish all blood cell types through a series of  
25 differentiation steps that involve the generation of lineage-committed progenitors as well as necessary  
26 expansion due to repeated cell divisions. However, whether cell division in HSCs precedes differentiation  
27 is unclear. To this end, we used an HSC cell tracing approach and Ki67<sup>RFP</sup> knock-in mice to assess  
28 simultaneously divisional history, cell cycle progression, and differentiation of adult HSCs *in vivo*. Our  
29 results reveal that HSCs are able to differentiate into restricted progenitors, especially common myeloid  
30 progenitors, restricted megakaryocyte-erythroid progenitors (PreMEs) and pre-megakaryocyte progenitors  
31 (PreMegs), without undergoing cell division and even before entering the S phase of the cell cycle.  
32 Additionally, the phenotype of the undivided but differentiated progenitors correlated with expression of  
33 lineage-specific genes that manifested as functional differences between HSCs and restricted progenitors.  
34 Thus, HSC fate decisions appear to be uncoupled from physical cell division. These results facilitate a  
35 better understanding of the mechanisms that control fate decisions in hematopoietic cells. Our data,  
36 together with separate findings from embryonic stem cells, suggest that cell division and fate choice are  
37 independent processes in pluripotent and multipotent stem cells.

38

## 39 **Introduction**

40 A rare population of hematopoietic stem cells (HSCs) resides at the top of the hematopoietic hierarchy <sup>1</sup>.  
41 Although most adult HSCs normally exist in a quiescent or dormant state <sup>2</sup>, some of them divide and  
42 support the production of all mature blood cell types through multiple intermediate progenitor stages,  
43 during steady state and in response to acute needs <sup>3-5</sup>. This classical point of view was questioned in  
44 recent studies from two groups showing that HSC populations contain stem-cell like megakaryocyte  
45 progenitors, which under stress conditions such as transplantation into irradiated recipients<sup>6</sup> or after acute  
46 inflammation<sup>7</sup>, activate a megakaryocyte differentiation program. The commitment process(es) that turns

47 HSCs into mature cells are currently understood to be a sequence (or even a continuum) of decision steps  
48 in which the multi-lineage potential of the cells is sequentially lost<sup>8-10</sup>. Although many of these steps  
49 have been investigated in great detail, the entire picture is still repeatedly challenged<sup>6,8,9,11-13</sup>. HSC  
50 transition through the multipotent and restricted progenitor stages is also accompanied by intense cell  
51 proliferation<sup>3</sup>. However, it is unclear whether each fate decision step is associated with one or more  
52 division events, or if cell proliferation and differentiation are independent processes. Further, if  
53 differentiation of HSCs does require cell division, the phase of the cell cycle that is particularly important  
54 for this process is also currently unknown. The dependence of cell-fate decisions on cell cycle progression  
55 was so far only shown *in vitro* for pluripotent embryonic stem cells<sup>14-17</sup>. However, a few reports point  
56 toward a functional connection between these two processes in adult stem cells, such as neuronal stem  
57 cells<sup>16,18</sup>. With regard to hematopoietic stem and progenitor cells, characterization of the cell cycle itself  
58 is currently ongoing<sup>19-22</sup>, and an understanding of how HSC fate decisions relate to cell division and cell  
59 cycle progression is lacking<sup>19</sup>.

60 Therefore, we used *in vivo* cell tracing to simultaneously follow the divisional history and the initial  
61 differentiation steps of HSCs. Our data reveal that HSCs are able to differentiate into restricted  
62 progenitors prior to cell division, most prominently megakaryocyte-erythroid progenitors (PreME) and  
63 pre-megakaryocyte progenitors (PreMeg), and that this occurs before the cells enter the S phase of the cell  
64 cycle. Moreover, our data also demonstrate that the G0/G1 phases are crucial for fate decision in HSCs to  
65 either differentiate or self-renew.

66

## 67 **Results**

### 68 **HSCs differentiate into myeloid progenitors *in vivo* without undergoing cell division**

69 To study the initial steps of HSC differentiation *in vivo*, we sorted Lin<sup>-</sup> Kit<sup>+</sup> Sca-1<sup>+</sup> (LSK) CD48<sup>-</sup> CD41<sup>-</sup>  
70 CD150<sup>+</sup> stem cells (Figure 1a)<sup>1</sup>. CD41<sup>+</sup> cells were excluded to avoid myeloid-<sup>23</sup> and megakaryocyte-

71 biased HSCs<sup>24-26</sup>. We used the CellTrace Violet dye<sup>27,28</sup> to uniformly label HSCs and track cell-division  
72 history after transplantation (Figure 1a). Recently, Shimoto et al have shown that numerous empty HSC  
73 niches are available upon transplantation into non-conditioned recipients, which are located distant from  
74 filled niches and available for HSC engraftment and proliferation. Moreover, donor HSCs give rise to all  
75 blood cells without any bias<sup>29</sup>. Labelled cells were transplanted into unconditioned recipients to prevent  
76 irradiation-induced stress<sup>30-32</sup> (Figure 1a). Thirty-six hours after transplantation, 30% of the donor cells  
77 had downregulated Sca-1 expression (Figure 1b), one of the principal surface markers for HSCs<sup>33</sup>, and  
78 changed their phenotype from HSCs to myeloid progenitors (MP). Importantly, the purification procedure  
79 alone did not lead to down-regulation of Sca-1 (Supplementary Figure 1a). A possible contamination of  
80 potential donor MPs was excluded, since transplantation of these progenitors alone did not result in any  
81 detectable donor MPs 36 hours later (Supplementary Figure 1b). To further classify these phenotypically  
82 restricted MPs *in vivo*, we used a previously described method of surface staining<sup>34</sup>; we initially  
83 confirmed its applicability after transplantation into lethally irradiated mice (Supplementary Figure 2a-b).  
84 Based on surface staining at 36 h post transplantation, we subdivided donor MPs into the following  
85 restricted progenitors: common myeloid progenitors (CMPs), granulocyte-macrophage progenitors  
86 (GMPs), pre-megakaryocyte-erythroid progenitors (PreMEs), and pre-megakaryocyte progenitors  
87 (PreMogs) (Figure 1b).

88 Next, we analyzed the proliferation history of transplanted cells based on dilution of CellTrace Violet  
89 dye, whereby intensity of the dye in CD4<sup>+</sup>CD62L<sup>+</sup> naïve T cells was used as the reference for undivided  
90 cells (Supplementary Figure 1c)<sup>35,36</sup>. This analysis reveals that, at 36 hours after HSC transplantation, a  
91 majority of LSK cells with the long-term HSC phenotype (LSK CD48<sup>-</sup> CD150<sup>+</sup>), short-term HSCs (ST-  
92 HSC) (LSK CD48<sup>-</sup> CD150<sup>-</sup>), multipotent progenitors (MPP2: LSK CD48<sup>+</sup> CD150<sup>+</sup> and MPP3/4 LSK  
93 CD48<sup>+</sup> CD150<sup>-</sup>) (Supplementary Figure 3a)<sup>1</sup> and 50% of the MPs remained undivided (Figure 1c).  
94 Additionally, based on CD41 and CD150 expression, these MPs were predominantly CMPs, PreMEs, and  
95 PreMogs (Figure 1d-e). We also performed an even more stringent gating strategy to avoid overlay

96 between non-divided and divided cells (Supplementary Figure 1d), but found no difference in the  
97 frequency of restricted progenitors, as compared to the previous gating strategy (Supplementary Figure  
98 1e). To exclude the possibility that HSCs differentiated into MPs without division due to the limited niche  
99 space, we used the HSC-CreERT+R26<sup>DTA/DTA</sup> mouse line allowing for the inducible depletion of HSCs  
100 and transplanted CellTrace dye labelled wild type HSCs into them<sup>37</sup> (Supplementary Figure 1f).  
101 However, we did not find any difference in the frequency of HSCs differentiated into myeloid restricted  
102 progenitors 36h after transplantation, compared to controls (Supplementary Figure 1g-h). Surprisingly,  
103 compared to mice not preconditioned with tamoxifen (TAM), we found that donor HSCs in TAM treated  
104 mice displayed enhanced differentiation into GMPs without cell division, suggesting potentially  
105 additional stress induced by TAM.

106 Interestingly, transplantation of MPP2 or MPP3/4 subsets revealed a similar phenomenon as most of the  
107 MPs did not divide. Further, while MPP2 cells mostly gave rise to PreMEs and PreMeg cells, MPP3/4  
108 cells differentiated into CMPs and GMPs (Supplementary Figure 3b-d). Taken together, these results  
109 strongly suggest that HSCs/MPPs can give rise to restricted progenitors including CMPs, PreMEs, and  
110 PreMegs based on the cell phenotype, without undergoing cell division.

### 111 **Phenotype of undivided differentiated progenitors correlates with expression of lineage-specific** 112 **genes**

113 To investigate the molecular differences between undivided HSCs and undivided MPs, we designed a  
114 panel of primers to analyse single-cell expression levels of 70 genes including cell cycle genes and those  
115 specific for HSCs, myeloid, erythroid, megakaryocyte-erythroid progenitors (MEP) and platelets  
116 (Supplementary Table 1)<sup>8,9,11,12,33,38-41</sup>. Essentially, single-cell expression analysis of freshly sorted HSCs,  
117 CMPs, PreMEs and PreMegs showed a clear separation of the cell types whether based on all analyzed  
118 genes or only on selected MEP/Platelet genes (Supplementary Figure 4a-c).

119 We then isolated undivided donor cells at 36h after transplantation of LSK CD48<sup>-</sup> CD41<sup>-</sup> CD150<sup>+</sup> cells  
120 (Figure 2a) and retrospectively categorized them on the basis of index-sorting data as HSCs (LSK CD48<sup>-</sup>  
121 CD150<sup>+</sup>) or various MP populations (Supplementary Figure 5a-d). Within these populations, we  
122 performed single-cell qPCR on 42 HSCs, 7 CMPs, 15 PreMEs, and 20 PreMegs, pooled and obtained  
123 from two independent experiments (Figure 2b). Performing t-distributed stochastic neighbor embedding  
124 (t-SNE) analysis of the qPCR data revealed separation of HSCs from PreMEs and PreMegs, based on all  
125 analysed genes (Figure 2c) or the MEP/Platelet genes alone (Figure 2d, Supplementary Table 1). This  
126 separation among phenotypically defined populations was also confirmed by a majority of the  
127 MEP/Platelet specific genes (Figure 2e, Supplementary Tables 2, 3, 4, 5), and was similar to that  
128 observed before transplantation (Supplementary Figure 4d). Thus, undivided PreME/PreMeg cells  
129 obtained after transplantation express genes typically restricted to megakaryocyte-erythroid progenitors.

130 For an in-depth comparative analysis of the transplanted undivided cells (Figure 2) and non-transplanted  
131 cells (Supplementary Figure 4), we performed tSNE<sup>42</sup> and hierarchical cluster analysis on gene  
132 expression data (Figure 3a-b). We wondered whether HSCs and PreMegs truly form distinctive subgroups  
133 in terms of their gene expression profile. Therefore, we excluded the intermediate cell differentiation  
134 stages (colored in green) and provided the algorithm with a number of expected clusters ( $k = 2$ ). Figure 3b  
135 illustrates that not only the visual inspection of the t-SNE visualization but also the k-means cluster  
136 algorithm is able to distinguish between those two cell types. As expected, while our results reveal a close  
137 association between the before- and after- transplantation HSC or PreMeg populations, HSCs and  
138 PreMegs themselves form distinct clusters. Therefore, changes in the HSC phenotype before cell division  
139 reflect gene expression changes associated with differentiation.

#### 140 **HSCs differentiate into restricted progenitors before entering the S phase of the cell cycle**

141 While the cell tracing dye allowed us to follow cell division, it did not give information on cell cycle  
142 progression. Therefore, to determine in which phase of the cell cycle HSCs make fate decisions, we  
143 scored each cell for its likely cell cycle phase using signatures for G1, S/G2/M phases<sup>39</sup>. We categorized

144 individual cells in the G<sub>0</sub>/G<sub>1</sub> or the S/G<sub>2</sub>/M phases (Figure 4a) based on the average expression of phase  
145 specific genes<sup>39,43</sup>. As expected, and later confirmed by expression of individual cell cycle genes (Figure  
146 4b), HSCs were more quiescent, with almost one-third of the PreME/PreMeg cells still in the G<sub>0</sub>/G<sub>1</sub>  
147 phases (Figure 4a). We also confirmed cluster separation between cells in G<sub>0</sub>/G<sub>1</sub> and S/G<sub>2</sub>/M phases by  
148 performing t-SNE analysis based on all 15 measured cell cycle genes but restricted to PreME/PreMeg  
149 populations (Figure 4c). Next, to determine if the expression of MEP/platelet genes is dependent on  
150 progression through the S/G<sub>2</sub>/M phases, we again used t-SNE analysis to compare PreME/PreMeg cells  
151 in the G<sub>0</sub>/G<sub>1</sub> and S/G<sub>2</sub>/M phases. Remarkably, there was no separation of cells according to their cell  
152 cycle status (Figure 4c), suggesting that PreME/PreMeg cells had previously upregulated differentiation  
153 genes in the G<sub>0</sub>/G<sub>1</sub> phases of the cell cycle. That PreME and PreMeg cells increase expression of lineage  
154 specific genes independent of cell cycle phase, was further supported by comparing the mean expression  
155 of MEP/Platelet genes between cells in G<sub>0</sub>/G<sub>1</sub> and S/G<sub>2</sub>/M phases (Figure 4d). Indeed, PreME and  
156 PreMeg cells increase expression of the lineage specific genes independent of cell cycle phases. These  
157 data imply that transplanted HSCs differentiate before entering the S phase of the cell cycle.

158 To corroborate these findings, we used the recently described Ki67<sup>RFP</sup> knock-in mice<sup>44</sup>. KI67 is a nuclear  
159 protein that is absent in the G<sub>0</sub> phase, starts to be synthesized at the beginning of the S phase, increases  
160 until mitosis, and gradually decreases thereafter in the G<sub>1</sub> phase of the daughter cells until re-entry into  
161 the S phase<sup>45</sup>. We first confirmed that none of the RFP<sup>-</sup> cells (LSK or MP) was in the S/G<sub>2</sub>/M phase,  
162 (Supplementary Figure 6a), and that only RFP<sup>+</sup> cells incorporated BrdU (Supplementary Figure 6b).  
163 Using an antibody against KI67, we found that RFP<sup>+</sup> expression truly reflects KI67 expression at the  
164 protein level (Supplementary Figure 6c). Thus, Ki67<sup>RFP</sup> knock-in mice are an appropriate tool to trace cell  
165 cycle progression in hematopoietic cells.

166 To follow HSCs through cell cycle progression and differentiation, we sorted RFP<sup>-</sup> HSCs residing in the  
167 G<sub>0</sub>/G<sub>1</sub> phases, labeled them with CellTrace Violet, and transplanted these cells into non-conditioned  
168 recipients. Our results reveal that the majority of donor undivided MPs did not upregulate RFP expression

169 (Figure 4e), thus remaining in the G0/G1 phases. When taken together with the above results, these  
170 findings demonstrate that HSCs do not require S phase entry to become phenotypic MPs.

### 171 **Functional differences between undivided HSCs and progenitors**

172 We used *in vitro* colony assays to verify functional differences between undivided phenotypic HSCs and  
173 MPs due to changes in gene expression profiles. Undivided donor HSCs (LSK CD48<sup>-</sup> CD150<sup>+</sup>) and  
174 PreMegs (Lin<sup>-</sup> Sca-1<sup>-</sup> Kit<sup>+</sup> CD150<sup>+</sup> CD41<sup>+</sup>) were isolated at 36h after transplantation and cultured as  
175 single cells in the presence of growth factors (SCF, TPO, IL-3 and EPO) <sup>46</sup>. Twelve days later, 89% of  
176 HSCs were multipotent and gave rise to all cell types (myeloid, erythroid, and megakaryocyte), whereas  
177 92% of the PreMegs differentiated into megakaryocytes alone, clearly suggesting that this population had  
178 lost their multipotency (Figure 5a).

179 We further investigated the *in vivo* repopulating capacity of donor cells. For this, we sorted undivided  
180 donor GFP<sup>+</sup> LSK and MP cells obtained at 36h after transplantation, injected them into non-conditioned  
181 recipients, and re-transplanted the same amount of cells into lethally irradiated wild type mice (Figure 5b-  
182 c). Although both populations gave rise to long-lived erythroid cells, only mice transplanted with LSKs  
183 displayed donor-derived GFP<sup>+</sup> short-lived neutrophils and platelets at 3 weeks after transplantation  
184 (Figure 5b-d). These observations imply that hematopoietic progenitor cells that down-regulate Sca-1  
185 without prior cell division, as expected, exhibit a dramatic reduction in their repopulation capacity.

186

### 187 **Discussion**

188 In this study, we demonstrated *in vivo* that HSCs can differentiate into ST-HSCs, MPPs, and even  
189 restricted myeloid progenitors, before undergoing cell division. Using a cell tracing approach and Ki67<sup>RFP</sup>  
190 knock-in mice, we followed HSC differentiation *in vivo* and analysed the expression of several essential  
191 megakaryocyte-erythroid and myeloid specific genes, and cell-cycle genes, at the single-cell level. Our  
192 findings using undivided PreMegs reveal that phenotypic and gene expression changes in undivided but



193 differentiated progenitors are accompanied by loss of multipotency and repopulation capacity after  
194 transplantation. Based on restricted PreME and PreMeg progenitors as an example of differentiated cells,  
195 we reveal that HSCs can initiate a specific differentiation program in the G0/G1 phases, which is before  
196 the actual physical division of the cell.

197 HSCs are rare cells that give rise to numerous blood cell types through a series of intermediate  
198 progenitors<sup>4</sup>. Multipotent and restricted progenitors intensively proliferate, making them the key  
199 amplifiers of cell numbers in the hematopoietic system<sup>3</sup>. The currently accepted model of hematopoiesis  
200 holds that HSCs have to divide in order to produce multipotent and lineage-restricted progenitor  
201 populations<sup>3,47,48</sup>. Thus, with respect to HSCs, proliferation and differentiation are currently characterized  
202 as simultaneous processes, however, to date, no direct *in vivo* proof of this concept has been provided. On  
203 the contrary, it is also conceivable that proliferation and differentiation exist as two independent  
204 processes. A few *in vitro* studies have supported this argument and have suggested that HSC division and  
205 differentiation are parallel processes. Indeed, while Mossadegh-Keller and colleagues<sup>49</sup> have shown that  
206 the myeloid transcription factor PU.1 is induced during the first cell cycle after *in vitro* stimulation of  
207 HSCs with M-CSF, Yamamoto and colleagues<sup>6</sup> reported that HSCs can divide asymmetrically and give  
208 rise to restricted long-term repopulating megakaryocyte progenitors even after the first division. Kent and  
209 colleagues<sup>50</sup> have shown that HSCs down regulated a number of transcription factors responsible for self-  
210 renewal division and lost long-term repopulation capacity before first division *in vitro*. Using a single cell  
211 sequencing approach, Yang and colleagues demonstrated that HSCs can express megakaryocyte and  
212 granulocyte specific genes during the G1 phase of the cell cycle<sup>51</sup>. However, no *in vivo* studies on the  
213 possible uncoupling of HSC fate decision and cell cycle progression are currently available.

214 Indeed, the idea that cells can make fate decisions in the G1 phase of the cell cycle is not new. Pluripotent  
215 stem cells (PSCs) initiate differentiation during progression through the G1 phase<sup>14</sup> due to the presence  
216 of a ‘window of opportunity’, which is dependent on epigenetic changes that occur during that phase. On  
217 the other hand, PSCs maintain their pluripotent state during the S and G2 phases of the cell cycle, which

218 is regulated by the cell cycle machinery but is independent of the G1 phase<sup>17</sup>. G1 phase specific cell  
219 cycle regulators such as cyclin D directly regulate the localization of differentiation transcriptional factors  
220 in PSCs<sup>52</sup>. Our results suggest a similar mechanism, which governs cell fate decisions in embryonic  
221 pluripotent and multipotent adult stem cells. Moreover, our data are also in line with another report,  
222 which demonstrated that division and differentiation of B cells into plasma cells were temporally  
223 separated with no significant influence on each other<sup>53</sup>.

224 In summary, we show that HSC division and their differentiation are probably independent processes and  
225 that HSCs make fate decisions before entering the S phase of the cell cycle. Additionally, these results  
226 open new directions in determining the factors that influence HSCs fate decisions in connection with cell  
227 cycle progression during normal hematopoiesis and pathologies associated with abnormal differentiation.

228

## 229 **References**

- 230 1 Oguro, H., Ding, L. & Morrison, S. J. SLAM family markers resolve functionally distinct  
231 subpopulations of hematopoietic stem cells and multipotent progenitors. *Cell stem cell*  
232 **13**, 102-116, doi:10.1016/j.stem.2013.05.014 (2013).
- 233 2 Wilson, A. *et al.* Hematopoietic stem cells reversibly switch from dormancy to self-  
234 renewal during homeostasis and repair. *Cell* **135**, 1118-1129,  
235 doi:10.1016/j.cell.2008.10.048 (2008).
- 236 3 Busch, K. *et al.* Fundamental properties of unperturbed haematopoiesis from stem cells in  
237 vivo. *Nature* **518**, 542-546, doi:10.1038/nature14242 (2015).
- 238 4 Sawai, C. M. *et al.* Hematopoietic Stem Cells Are the Major Source of Multilineage  
239 Hematopoiesis in Adult Animals. *Immunity* **45**, 597-609,  
240 doi:10.1016/j.immuni.2016.08.007 (2016).

- 241 5 Nestorowa, S. *et al.* A single cell resolution map of mouse haematopoietic stem and  
242 progenitor cell differentiation. *Blood*, doi:10.1182/blood-2016-05-716480 (2016).
- 243 6 Yamamoto, R. *et al.* Clonal analysis unveils self-renewing lineage-restricted progenitors  
244 generated directly from hematopoietic stem cells. *Cell* **154**, 1112-1126,  
245 doi:10.1016/j.cell.2013.08.007 (2013).
- 246 7 Haas, S. *et al.* Inflammation-Induced Emergency Megakaryopoiesis Driven by  
247 Hematopoietic Stem Cell-like Megakaryocyte Progenitors. *Cell Stem Cell*,  
248 doi:10.1016/j.stem.2015.07.007 (2015).
- 249 8 Hoppe, P. S. *et al.* Early myeloid lineage choice is not initiated by random PU.1 to  
250 GATA1 protein ratios. *Nature* **535**, 299-302, doi:10.1038/nature18320 (2016).
- 251 9 Paul, F. *et al.* Transcriptional Heterogeneity and Lineage Commitment in Myeloid  
252 Progenitors. *Cell* **163**, 1663-1677, doi:10.1016/j.cell.2015.11.013 (2015).
- 253 10 Velten, L. *et al.* Human haematopoietic stem cell lineage commitment is a continuous  
254 process. *Nat Cell Biol* **19**, 271-281, doi:10.1038/ncb3493 (2017).
- 255 11 Cabezas-Wallscheid, N. *et al.* Identification of regulatory networks in HSCs and their  
256 immediate progeny via integrated proteome, transcriptome, and DNA Methylome  
257 analysis. *Cell Stem Cell* **15**, 507-522, doi:10.1016/j.stem.2014.07.005 (2014).
- 258 12 Guo, G. *et al.* Mapping cellular hierarchy by single-cell analysis of the cell surface  
259 repertoire. *Cell Stem Cell* **13**, 492-505, doi:10.1016/j.stem.2013.07.017 (2013).
- 260 13 Haghverdi, L., Buettner, F. & Theis, F. J. Diffusion maps for high-dimensional single-  
261 cell analysis of differentiation data. *Bioinformatics* **31**, 2989-2998,  
262 doi:10.1093/bioinformatics/btv325 (2015).

- 263 14 Pauklin, S. & Vallier, L. The cell-cycle state of stem cells determines cell fate propensity.  
264 *Cell* **155**, 135-147, doi:10.1016/j.cell.2013.08.031 (2013).
- 265 15 Singh, A. M. *et al.* Cell-Cycle Control of Bivalent Epigenetic Domains Regulates the  
266 Exit from Pluripotency. *Stem cell reports* **5**, 323-336, doi:10.1016/j.stemcr.2015.07.005  
267 (2015).
- 268 16 Dalton, S. Linking the Cell Cycle to Cell Fate Decisions. *Trends in cell biology* **25**, 592-  
269 600, doi:10.1016/j.tcb.2015.07.007 (2015).
- 270 17 Gonzales, K. A. *et al.* Deterministic Restriction on Pluripotent State Dissolution by Cell-  
271 Cycle Pathways. *Cell* **162**, 564-579, doi:10.1016/j.cell.2015.07.001 (2015).
- 272 18 Lange, C., Huttner, W. B. & Calegari, F. Cdk4/cyclinD1 overexpression in neural stem  
273 cells shortens G1, delays neurogenesis, and promotes the generation and expansion of  
274 basal progenitors. *Cell stem cell* **5**, 320-331, doi:10.1016/j.stem.2009.05.026 (2009).
- 275 19 Laurenti, E. *et al.* CDK6 levels regulate quiescence exit in human hematopoietic stem  
276 cells. *Cell stem cell* **16**, 302-313, doi:10.1016/j.stem.2015.01.017 (2015).
- 277 20 Mende, N. *et al.* CCND1-CDK4-mediated cell cycle progression provides a competitive  
278 advantage for human hematopoietic stem cells in vivo. *J Exp Med* **212**, 1171-1183,  
279 doi:10.1084/jem.20150308 (2015).
- 280 21 Matsumoto, A. *et al.* p57 is required for quiescence and maintenance of adult  
281 hematopoietic stem cells. *Cell stem cell* **9**, 262-271, doi:10.1016/j.stem.2011.06.014  
282 (2011).
- 283 22 Zou, P. *et al.* p57(Kip2) and p27(Kip1) cooperate to maintain hematopoietic stem cell  
284 quiescence through interactions with Hsc70. *Cell stem cell* **9**, 247-261,  
285 doi:10.1016/j.stem.2011.07.003 (2011).

- 286 23 Gekas, C. & Graf, T. CD41 expression marks myeloid-biased adult hematopoietic stem  
287 cells and increases with age. *Blood* **121**, 4463-4472, doi:10.1182/blood-2012-09-457929  
288 (2013).
- 289 24 Miyawaki, K. *et al.* CD41 Marks the Initial Myelo-Erythroid Lineage Specification in  
290 Adult Mouse Hematopoiesis: Redefinition of Murine Common Myeloid Progenitor. *Stem*  
291 *Cells* **33**, 976-987, doi:DOI 10.1002/stem.1906 (2015).
- 292 25 Roch, A., Trachsel, V. & Lutolf, M. P. Brief Report: Single-Cell Analysis Reveals Cell  
293 Division-Independent Emergence of Megakaryocytes From Phenotypic Hematopoietic  
294 Stem Cells. *Stem Cells* **33**, 3152-3157, doi:10.1002/stem.2106 (2015).
- 295 26 Bernitz, J. M., Kim, H. S., MacArthur, B., Sieburg, H. & Moore, K. Hematopoietic Stem  
296 Cells Count and Remember Self-Renewal Divisions. *Cell* **167**, 1296-1309 e1210,  
297 doi:10.1016/j.cell.2016.10.022 (2016).
- 298 27 Pina, C. *et al.* Inferring rules of lineage commitment in haematopoiesis. *Nat Cell Biol* **14**,  
299 287-294, doi:10.1038/ncb2442 (2012).
- 300 28 Quah, B. J. C. & Parish, C. R. New and improved methods for measuring lymphocyte  
301 proliferation in vitro and in vivo using CFSE-like fluorescent dyes. *J Immunol Methods*  
302 **379**, 1-14, doi:10.1016/j.jim.2012.02.012 (2012).
- 303 29 Shimoto, M., Sugiyama, T. & Nagasawa, T. Numerous niches for hematopoietic stem  
304 cells remain empty during homeostasis. *Blood* **129**, 2124-2131, doi:10.1182/blood-2016-  
305 09-740563 (2017).
- 306 30 Cao, X. *et al.* Irradiation induces bone injury by damaging bone marrow  
307 microenvironment for stem cells. *Proc Natl Acad Sci U S A* **108**, 1609-1614,  
308 doi:10.1073/pnas.1015350108 (2011).

- 309 31 Abbuehl, J. P., Tatarova, Z., Held, W. & Huelsken, J. Long-Term Engraftment of  
310 Primary Bone Marrow Stromal Cells Repairs Niche Damage and Improves  
311 Hematopoietic Stem Cell Transplantation. *Cell stem cell* **21**, 241-255 e246,  
312 doi:10.1016/j.stem.2017.07.004 (2017).
- 313 32 Schaeue, D., Kachikwu, E. L. & McBride, W. H. Cytokines in radiobiological responses: a  
314 review. *Radiat Res* **178**, 505-523, doi:10.1667/RR3031.1 (2012).
- 315 33 Wilson, N. K. *et al.* Combined Single-Cell Functional and Gene Expression Analysis  
316 Resolves Heterogeneity within Stem Cell Populations. *Cell Stem Cell* **16**, 712-724,  
317 doi:10.1016/j.stem.2015.04.004 (2015).
- 318 34 Pronk, C. J. *et al.* Elucidation of the phenotypic, functional, and molecular topography of  
319 a myeloerythroid progenitor cell hierarchy. *Cell Stem Cell* **1**, 428-442,  
320 doi:10.1016/j.stem.2007.07.005 (2007).
- 321 35 Takizawa, H., Regoes, R. R., Boddupalli, C. S., Bonhoeffer, S. & Manz, M. G. Dynamic  
322 variation in cycling of hematopoietic stem cells in steady state and inflammation. *The*  
323 *Journal of experimental medicine* **208**, 273-284 (2010).
- 324 36 Pietras, E. M. *et al.* Chronic interleukin-1 exposure drives haematopoietic stem cells  
325 towards precocious myeloid differentiation at the expense of self-renewal. *Nat Cell Biol*  
326 **18**, 607-618, doi:10.1038/ncb3346 (2016).
- 327 37 Schoedel, K. B. *et al.* The bulk of the hematopoietic stem cell population is dispensable  
328 for murine steady-state and stress hematopoiesis. *Blood* **128**, 2285-2296,  
329 doi:10.1182/blood-2016-03-706010 (2016).
- 330 38 Gottgens, B. Regulatory network control of blood stem cells. *Blood* **125**, 2614-2620,  
331 doi:10.1182/blood-2014-08-570226 (2015).

- 332 39 Kowalczyk, M. S. *et al.* Single-cell RNA-seq reveals changes in cell cycle and  
333 differentiation programs upon aging of hematopoietic stem cells. *Genome research* **25**,  
334 1860-1872, doi:10.1101/gr.192237.115 (2015).
- 335 40 Klimmeck, D. *et al.* Transcriptome-wide profiling and posttranscriptional analysis of  
336 hematopoietic stem/progenitor cell differentiation toward myeloid commitment. *Stem cell*  
337 *reports* **3**, 858-875, doi:10.1016/j.stemcr.2014.08.012 (2014).
- 338 41 Moignard, V. *et al.* Characterization of transcriptional networks in blood stem and  
339 progenitor cells using high-throughput single-cell gene expression analysis. *Nat Cell Biol*  
340 **15**, 363-372, doi:10.1038/ncb2709 (2013).
- 341 42 van der Maaten, L. & Hinton, G. Visualizing Data using t-SNE. *Journal of Machine*  
342 *Learning Research* **9**, 2579-2605 (2008).
- 343 43 Whitfield, M. L. *et al.* Identification of genes periodically expressed in the human cell  
344 cycle and their expression in tumors. *Mol Biol Cell* **13**, 1977-2000, doi:10.1091/mbc.02-  
345 02-0030. (2002).
- 346 44 Basak, O. *et al.* Mapping early fate determination in Lgr5+ crypt stem cells using a novel  
347 Ki67-RFP allele. *The EMBO journal* **33**, 2057-2068, doi:10.15252/embj.201488017  
348 (2014).
- 349 45 Scholzen, T. & Gerdes, J. The Ki-67 protein: from the known and the unknown. *Journal*  
350 *of cellular physiology* **182**, 311-322, doi:10.1002/(SICI)1097-  
351 4652(200003)182:3<311::AID-JCP1>3.0.CO;2-9 (2000).
- 352 46 Grinenko, T. *et al.* Clonal expansion capacity defines two consecutive developmental  
353 stages of long-term hematopoietic stem cells. *J Exp Med* **211**, 209-215,  
354 doi:10.1084/jem.20131115 (2014).

- 355 47 Eaves, C. J. Hematopoietic stem cells: concepts, definitions, and the new reality. *Blood*  
356 **125**, 2605-2613, doi:10.1182/blood-2014-12-570200 (2015).
- 357 48 Sun, J. *et al.* Clonal dynamics of native haematopoiesis. *Nature* **514**, 322-327,  
358 doi:10.1038/nature13824 (2014).
- 359 49 Mossadegh-Keller, N. *et al.* M-CSF instructs myeloid lineage fate in single  
360 haematopoietic stem cells. *Nature* **497**, 239-243, doi:10.1038/nature12026 (2013).
- 361 50 Kent, D. G., Dykstra, B. J., Cheyne, J., Ma, E. & Eaves, C. J. Steel factor coordinately  
362 regulates the molecular signature and biologic function of hematopoietic stem cells.  
363 *Blood* **112**, 560-567, doi:10.1182/blood-2007-10-117820 (2008).
- 364 51 Yang, J. *et al.* Single cell transcriptomics reveals unanticipated features of early  
365 hematopoietic precursors. *Nucleic acids research* **45**, 1281-1296,  
366 doi:10.1093/nar/gkw1214 (2017).
- 367 52 Singh, A. M. *et al.* Signaling network crosstalk in human pluripotent cells: a Smad2/3-  
368 regulated switch that controls the balance between self-renewal and differentiation. *Cell*  
369 *stem cell* **10**, 312-326, doi:10.1016/j.stem.2012.01.014 (2012).
- 370 53 Duffy, K. R. *et al.* Activation-induced B cell fates are selected by intracellular stochastic  
371 competition. *Science* **335**, 338-341, doi:10.1126/science.1213230 (2012).
- 372 54 Bonifacio, E. *et al.* Effects of high-dose oral insulin on immune responses in children at  
373 high risk for type 1 diabetes: the Pre-POINT randomized clinical trial. *JAMA* **313**, 1541-  
374 1549, doi:10.1001/jama.2015.2928 (2015).
- 375 55 Fuchs, Y. F. *et al.* CD8+ T cells specific for the islet autoantigen IGRP are restricted in  
376 their T cell receptor chain usage. *Sci Rep* **7**, 44661, doi:10.1038/srep44661 (2017).



377 56 McDavid, A. *et al.* Modeling bi-modality improves characterization of cell cycle on gene  
378 expression in single cells. *PLoS Comput Biol* **10**, e1003696,  
379 doi:10.1371/journal.pcbi.1003696 (2014).

380

### 381 **Acknowledgements**

382 TG received support from the Fritz Thyssen foundation (10.14.2.153). BW was supported by the  
383 Heisenberg program (Deutsche Forschungsgemeinschaft – DFG, Germany; WI3291/ 5-1). This work was  
384 supported by grants from the DFG (SFB655 “Cells into Tissues” to TC and GR4857/1-1 to TG), a CRTD  
385 seed grant to TG and BW and a European Research Council grant (683145) to TC. The work of LT and  
386 IG was supported by the German Federal Ministry of Research and Education, Grant number 031A315  
387 “*MessAge*”. We would like to thank Dr. Vasuprada Iyengar for critically reading the manuscript.

388

### 389 **Author Contributions**

390 Conceptualization, T.G. and B.W.; investigation, A.K., S.D., and T.G.; methodology, T.G., A.E., L.T.,  
391 B.R., M.B., A.G. and I.G.; resources, T.G., B.W., O.B. and H.C.; writing original draft, T.G. and B.W.;  
392 Writing, review and editing, T.G., B.W., I.G., L.T. T.C. and A.E.; funding acquisition T.G., B.W., L.T.,  
393 T.C. and I.G.; Supervision, T.G., B.W. and T.C.

394 We do not have any competing financial interests.

## 395 **Materials and Methods**

396 **Mice.** C57BL/6 (B6), B6.SJL-PtprcaPep3b/BoyJ (B6.SJL), HSC-CreERT/R-DTA and Ubc:GFP mice  
397 were purchased from the Jackson Laboratory. Ki67<sup>RFP</sup> knock-in mice have been described before <sup>44</sup>. All  
398 mice were bred and maintained under specific pathogen-free conditions in the animal facility at the  
399 Medical Theoretical Center of the University of Technology, Dresden. Experiments were performed in  
400 accordance with the German animal welfare legislation and were approved by local authorities.

401 **Cre-activation.** One week before the start of TAM administration, mice were kept on low phytoestrogen  
402 standard diet (LASvendi, Solingen, Germany). 30 mg tamoxifen tablets (Ratiopharm, Ulm, Germany)  
403 were dissolved overnight in lipid emulsion (SMOFlipid, Fresenius Kabi, Bad Homburg, Germany). 20  
404 mg/ml tamoxifen solution was applied two times (72h apart) by oral gavage at a dose of 0.2mg / g body  
405 weight to animals at the age of 8 – 14 weeks.

406 **Transplantation.** Bone marrow was isolated from mouse tibia, femora, pelvis, and vertebrae, crushed,  
407 and filtered through a 70- $\mu$ m cell strainer. Cells were lysed in ACK Lysis Buffer (Life technologies at  
408 A10492-01), and lineage depleted using biotinylated antibodies (anti-mouse CD3 (2C11; 17A2), CD11b  
409 (M1/70), CD19 (1D3), CD45R (RA3-6B2), Gr-1 (RB6-8C5), Nk1.1 (PK136)) and anti-biotin micro-  
410 beads using magnetic cell separation (Miltenyi Biotec Germany Cat. 130-090-485). Cells were then  
411 stained with antibodies and CellTrace Violet dye (Molecular Probes Cat. C34557) according to  
412 manufacturer's instructions. Cells were sorted on a FACS Aria II or III (BD Bioscience). 3600 HSCs  
413 (Lin<sup>-</sup> Sca-1<sup>+</sup> Kit<sup>+</sup> (LSK) CD48<sup>-</sup> CD41<sup>-</sup> CD150<sup>+</sup>), 5000 MPP2 (LSK CD48<sup>+</sup> CD150<sup>+</sup>), or 10000 MPP3/4  
414 (Lin<sup>-</sup> LSK CD48<sup>+</sup> CD150<sup>-</sup>) cells were transplanted via intravenous injection into non-conditioned  
415 C57BL/6 mice. CD4<sup>+</sup>CD62L<sup>+</sup> naïve T cells ( $10^6$ ), labeled with CellTrace Violet, were transplanted as  
416 controls for 'undivided cells. Lymph node donor cells were analyzed 36h after transplantation along with  
417 LSK cells. For transplantation of cells from Ki67<sup>RFP</sup> knock-in mice, RFP<sup>-</sup> cells were sorted and donor BM  
418 cells were analyzed 36h after transplantation, based on CellTrace Violet staining. For competitive  
419 transplantation, 20 GFP<sup>+</sup> LSK cells or MPs (Lin<sup>-</sup> Sca-1<sup>-</sup> Kit<sup>+</sup>) were sorted 36h after a primary

420 transplantation of 3600 HSCs from Ubc-GFP mice into unconditioned recipient C57BL/6 mice. LSKs and  
421 MPs were transplanted together with  $10^5$  non-fractionated BM cells from B6.SJL mice into lethally  
422 irradiated (900 cGy) C57BL/6 wild-type recipients.

423 **Flow cytometry.** All analyses were done on FACS Aria II and Canto (BD Bioscience). The antibodies  
424 used for staining are CD117 (2B8), Sca-1 (D7), Ter119 (Ter119), CD41 (MWRReg30), CD48 (HM48-1),  
425 CD105 (MJ7/18), CD16/32 (93), CD11b (M1/70), Gr-1 (RB6-8C5), all from eBioscience, CD150 (TC15-  
426 12F1; BioLegend).

427 **Single-cell index sorting.** Isolated cells were single-cell sorted into 8-well strips containing  $5\mu\text{l}$  of PBS.  
428 To record marker levels of each cell, the FACS Diva-7 “index sorting” function was activated during cell  
429 sorting. Using index sorting, single cells were sorted from the entire  $\text{Lin}^- \text{Kit}^+$  CellTrace Violet<sup>+</sup> space,  
430 and the intensities of the Cell Trace Violet, Kit, Sca-1, CD41, CD48, CD150, CD105, and CD16/32  
431 FACS markers recorded and linked to each cell’s position.

432 **Cytospins.** Cells were spun onto object slides at 500 RPM, dried and stained with May-Grunwald and  
433 Gimza solution (Sigma Aldrich).

434 **In vitro culture.** Single cells were sorted and cultured in 96 well plates in StemSpan SFEM medium  
435 (STEMCELL Technologies, Cat. 09600) supplemented with 20 ng/ml rmSCF (Peprotech, 250-03), 20  
436 ng/ml rmTpo (eBioscience, 34-8686-63), 20 ng/ml rmIl3 (Peprotech, 213-13), and 5 U/ml rhEpo (Roche),  
437 and cultivated for 12 days at  $37^{\circ}\text{C}$  with 5%  $\text{CO}_2$ .

438 **Cell cycle analyses.** For intracellular staining, cells were fixed and permeabilized using fixation and  
439 permeabilization buffers from eBioscience. To distinguish between the G0 and G1 phase, cells were  
440 stained for intracellular Ki-67 FITC (eBiosciences, clone SolA15). DAPI (4, 6 diamidino-2-phenylindole;  
441 Molecular Probes) was used to measure DNA content and separate the cells in S/G2/M phases from those  
442 in the G0 and G1 phase. For the BrdU incorporation assay,  $10\mu\text{M}$  BrdU (Sigma-Aldrich) was added to the  
443 culture for 3.5 h and BrdU incorporation analyses performed as described previously<sup>46</sup> using anti-BrdU-  
444 FITC ab (eBioscience, clone BU20a).

445 **Clustering based analysis of cell cycle state.** Cell cycle genes were classified based on single cell deep  
446 sequencing data <sup>39</sup> or defined previously in synchronized HeLa cells <sup>43</sup> (G1 phase genes: Ccne1, Cdk2,  
447 Cdkn1a, Cdkn1c, S/G2/M phase genes: Cdkn2d, E2f4, Cdk6, Cdkn2c, Ccng2, Ccnf, Mki67, Ccna2,  
448 Ccnb1, Ccnb2, Cdc20). First, expression of each gene for each cell was normalized to the maximum  
449 expression of the gene; second, cell cycle signature for each cell was defined as the average expression of  
450 phase specific subsets of cell cycle genes. Discrimination between G1 and S/G2/M was done based on  
451 the distribution of control HSCs (before transplantation) and data that around 90% of HSCs (mouse strain  
452 C57Bl6) are in G0/G1 phase of the cell cycle.

453 **Single-cell qPCR.** Gene expression profiles of single cells were obtained as previously described <sup>54,55</sup> but  
454 with modifications. cDNA was synthesized directly on the cells using the Quanta qScript TM cDNA  
455 Supermix. Total cDNA was pre-amplified for 20 cycles (1x 95°C 5', 95°C 45'', 60°C, 1', 72°C 1.5') and  
456 once at 68°C for 10' using the Multiplex PCR Kit (Qiagen, Hilden, Germany) in a final volume of 35 µl  
457 in the presence of primer pairs (25nM for each primer) for all genes (listed in Table S1). Pre-amplified  
458 cDNA (10 µl) was then treated with 1.2 U Exonuclease I and gene expression quantified by real time  
459 PCR on the BioMark™ HD System (© Fluidigm Corporation, CA, USA) using the 96.96 Dynamic Array  
460 IFC, the GE 96x96 Fast PCR+ Melt protocol, the SsoFast EvaGreen Supermix with Low ROX (BIO  
461 RAD, CA, USA), and 5 µM primers, for each assay. Raw data were analyzed using the Fluidigm Real-  
462 Time PCR analysis software.

463 **Bioinformatics analysis.** Pre-processing and data analysis of single-cell expression profiles were  
464 conducted using KNIME 2.11.2, R Version 3.3.2 and RStudio Version 0.99.486 and version 1.0.136  
465 (Boston, MA, USA) software. Where further required, pre-processing via a linear model to correct for  
466 confounding sampling effects was conducted as previously described <sup>54</sup>. t-SNE plots were created using  
467 the R package 'Rtsne'. To model the bi-modal gene expression of single cells, the Hurdle model, a semi-  
468 continuous modeling framework, was applied to pre-processed data <sup>56</sup>. This allowed us to assess  
469 differential expression profiles as a function of frequency of expression and mean positive expression

470 using a likelihood ratio test. k-means clustering for k=2 was performed on the normalized data and using  
471 the R package 'stats'.

472 **Statistical analysis.** Data were expressed as mean +/- standard deviation (s.d.). Statistical analyses based  
473 on unpaired Student's t test were performed using Prism 5.0 software (GraphPad). P value <0.05 were  
474 considered as statistical significant.

475

476

477

478

479

480

481

482

483

484

485

486

487

488

489

490

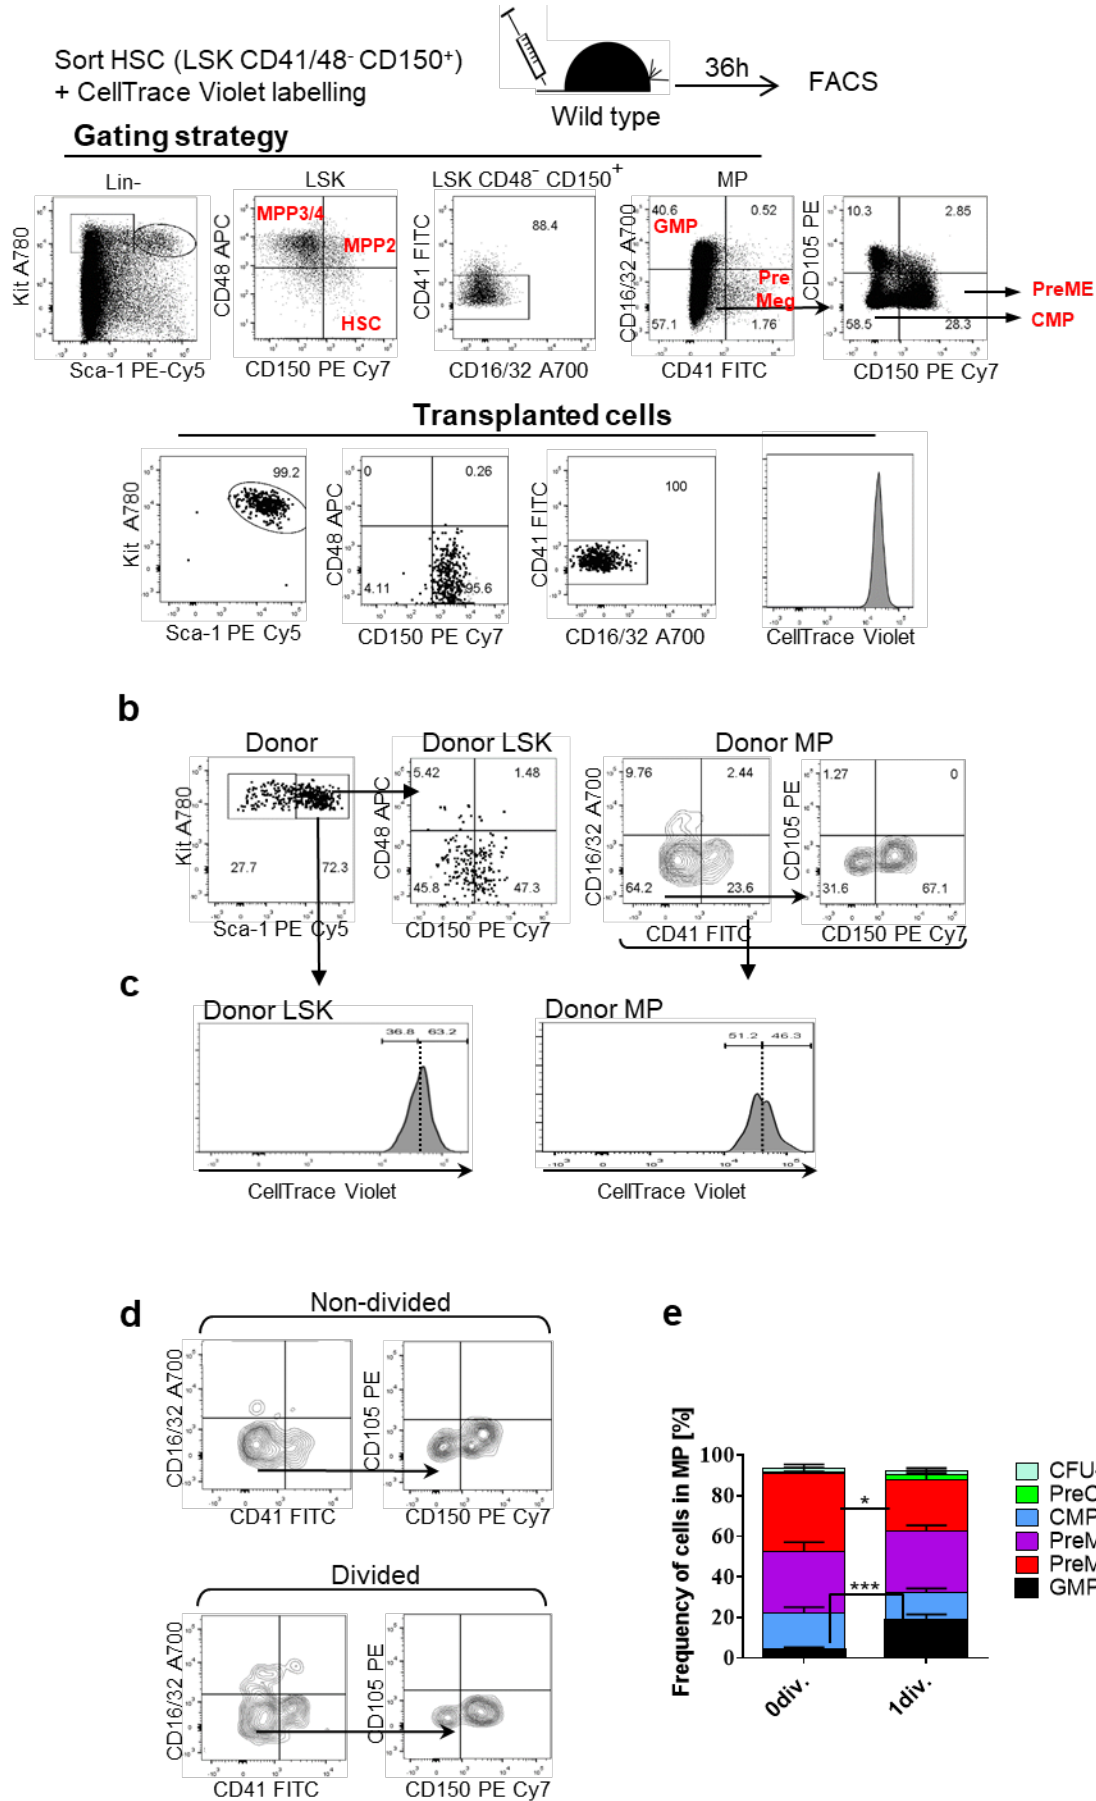

492 **Figure 1. Differentiation and division proliferation history of HSCs after transplantation into non-**  
493 **conditioned recipients.**

494 **(a)** HSCs (LSK CD48<sup>-</sup> CD41<sup>-</sup> CD150<sup>+</sup>) were labelled with CellTrace Violet dye and 3600 cells were  
495 transplanted into non-conditioned wild type mice. Purity of transplanted cells was more than 99% for  
496 each experiment. **(b)** Bone marrow was harvested at 36h after transplantation and recipient cells were  
497 analyzed using indicated gates. **(c)** Dilution of CellTrace Violet in donor LSK and MPs, 36h after  
498 transplantation. Labelled and transplanted naïve CD62L<sup>+</sup>CD4<sup>+</sup> T cells were used as reference for  
499 undivided cells. 500 donor cells were analyzed from 11 transplanted mice, representative data for one out  
500 of 13 experiments **(d)** Phenotype of undivided and divided donor MPs (n=11), representative example of  
501 13 independent experiments. **(e)** Frequency of restricted progenitors in undivided ('0' div.) and divided (1  
502 div.) donor MPs, pooled data from 13 independent experiments. Unpaired Student t-test, data are means  
503 +/- S.D., P\*\*\*=0.0002, P\*=0.02.

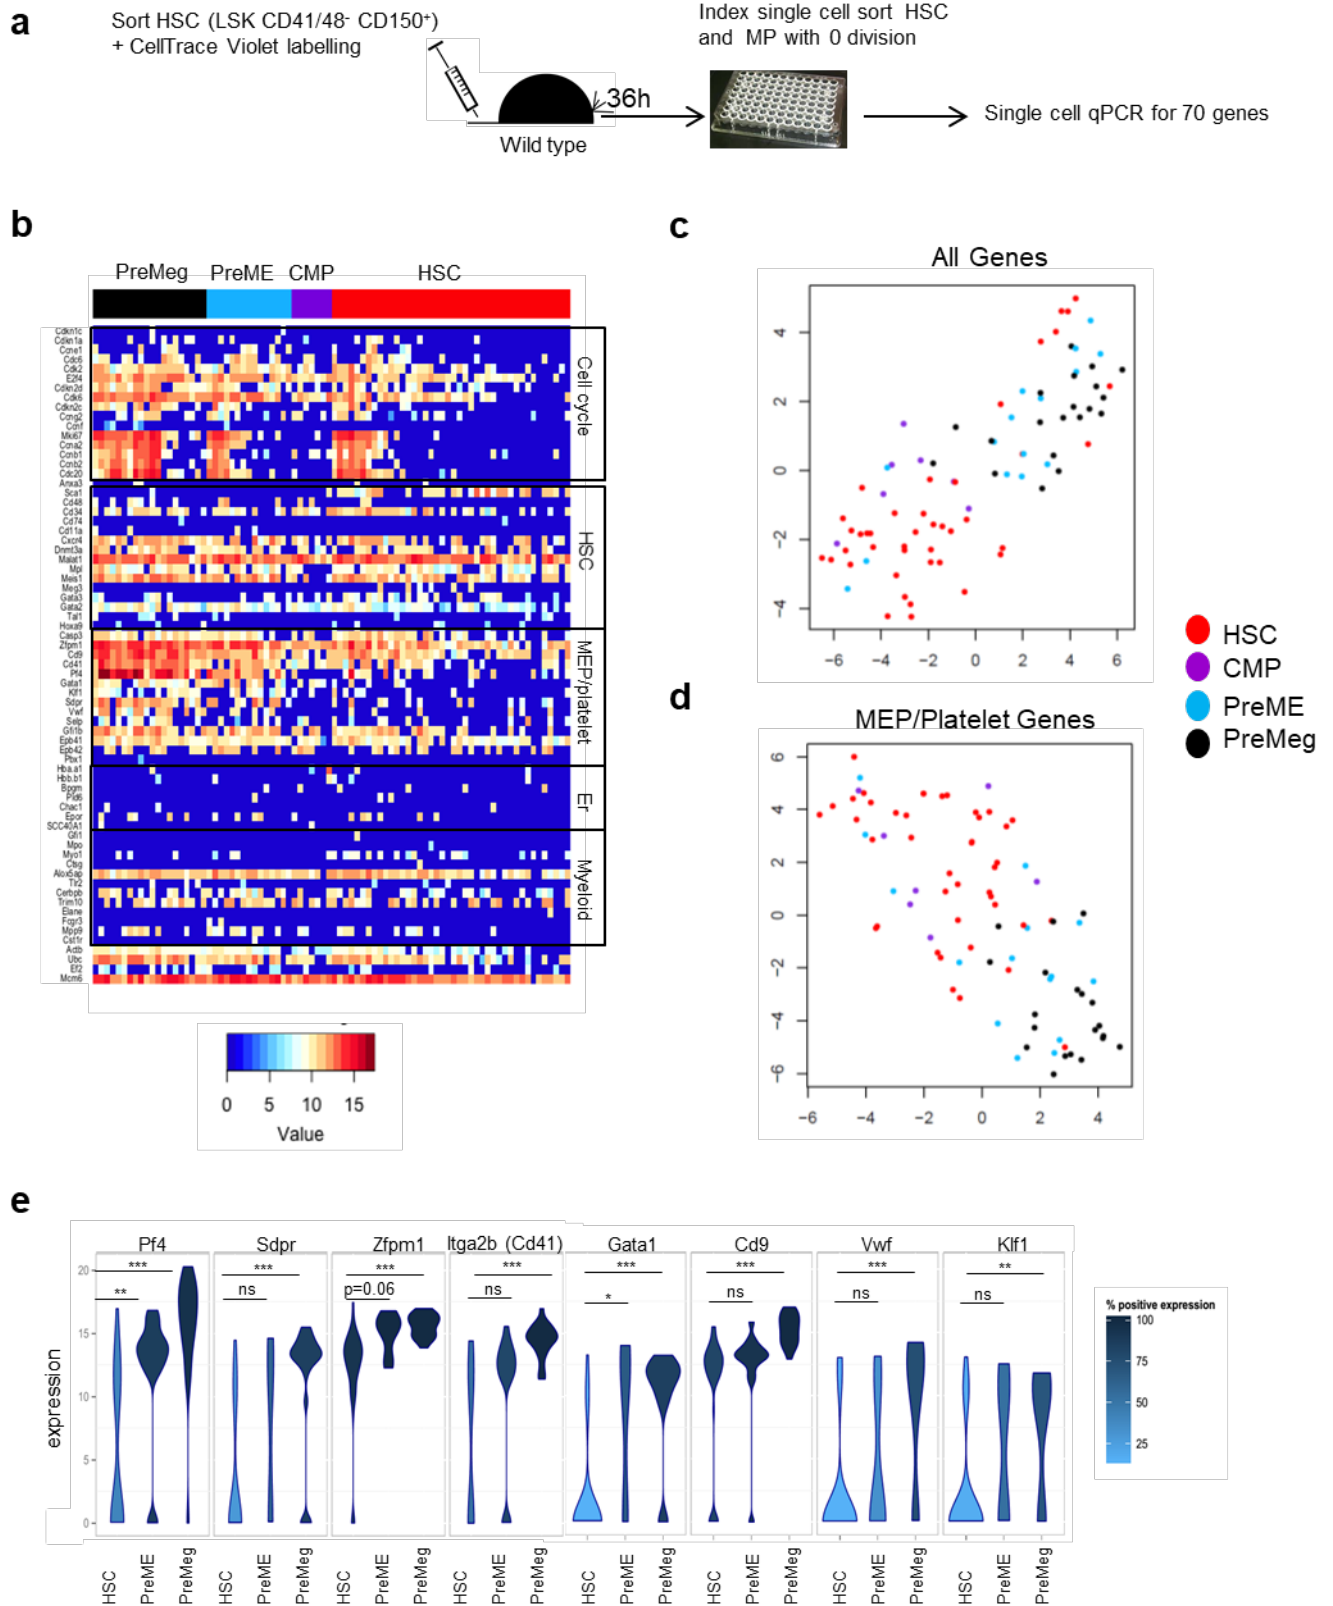

504

505 **Figure 2. Single cell expression analysis in undivided donor HSCs and MPs.**



506 **(a)** Experimental design. LSK CD48<sup>-</sup> CD41<sup>-</sup> CD150<sup>+</sup> cells were transplanted into non-irradiated  
507 recipients, and single, undivided donor Lin<sup>-</sup> Kit<sup>+</sup> cells were sorted using the index sort approach at 36h  
508 after transplantation. Data from two independent experiments (n= 12 mice). Based on index sort data,  
509 HSCs were defined as LSK CD48<sup>-</sup> CD150<sup>+</sup>; CMPs as Lin<sup>-</sup> Kit<sup>+</sup> Sca-1<sup>-</sup> CD16/32<sup>-</sup> CD41<sup>-</sup> CD150<sup>-</sup> CD105<sup>-</sup>;  
510 PreME as Lin<sup>-</sup> Kit<sup>+</sup> Sca-1<sup>-</sup> CD16/32<sup>-</sup> CD41<sup>-</sup> CD150<sup>+</sup> CD105<sup>-</sup>; and PreMeg as Lin<sup>-</sup> Kit<sup>+</sup> Sca-1<sup>-</sup> CD16/32<sup>-</sup>  
511 CD41<sup>+</sup> CD150<sup>+</sup> CD105<sup>-</sup>. All sorted 42 HSC, 7 CMP, 15 PreME and 20 PreMeg cells were analyzed. **(b)**  
512 Heat map showing gene expression analysis. Each row corresponds to a specific gene, each column  
513 corresponds to a specific and individual donor cell, and colors represent expression levels of individual  
514 genes (dCt). **(c)** t-SNE plot for all analyzed genes and cells, axes have arbitrary units. **(d)** t-SNE plot for  
515 MEP/Platelet genes for all cells, axes have arbitrary units. **(e)** Violin density plots for the most differently  
516 expressed MEP/Platelet genes. Y-axis represents gene expression. The horizontal width of the plot shows  
517 the density of the data along the Y-axis. Statistical significance was determined using the Hurdle model.  
518 \*(p<0.05), \*\*(p<0.01), \*\*\*(p<0.0001), ns (not significant). Data from 2 independent experiments, n=12.  
519 Exact P value in supplemental Tables S2-3.

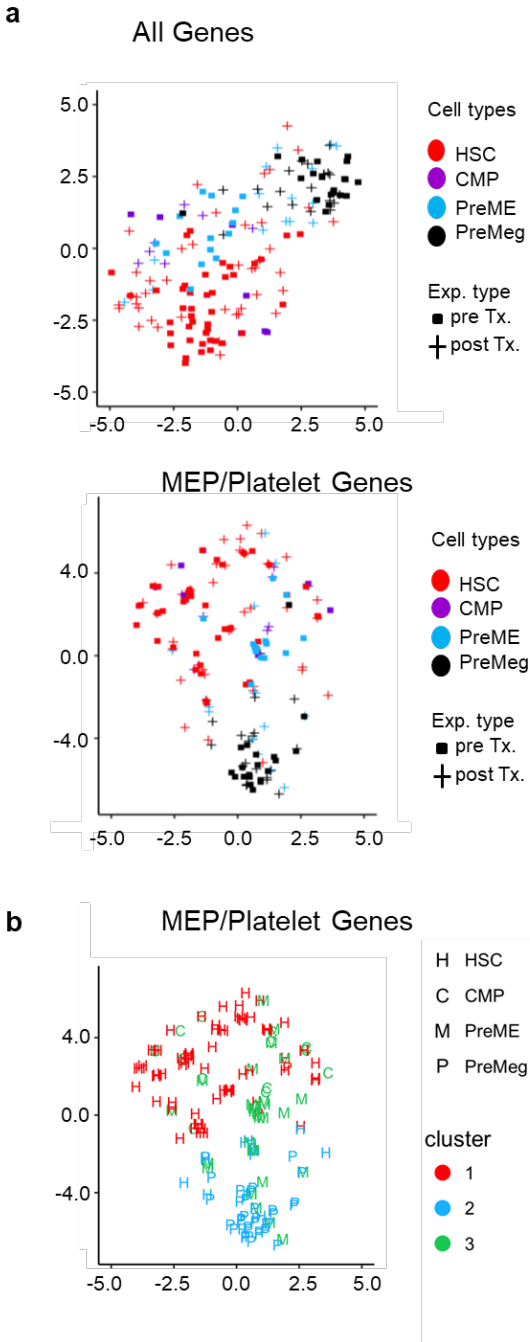

520

521 **Figure 3. Comparison of gene expression between cells before transplantation and undivided cells**  
522 **after transplantation.**

523 (a) t-SNE plot for all analyzed genes (top panel) and MEP/Platelet genes (bottom panel) for all cells

524 before transplantation and undivided donor cells at 36h after transplantation. Axes display arbitrary units.

525 **(b)** t-SNE visualization for all cells before transplantation and all undivided cells after transplantation  
526 (36h). The color coding depicts the results of a reproducible k-means clustering (k=2) on all cells before  
527 and after transplantation based on MEP/Platelet genes.

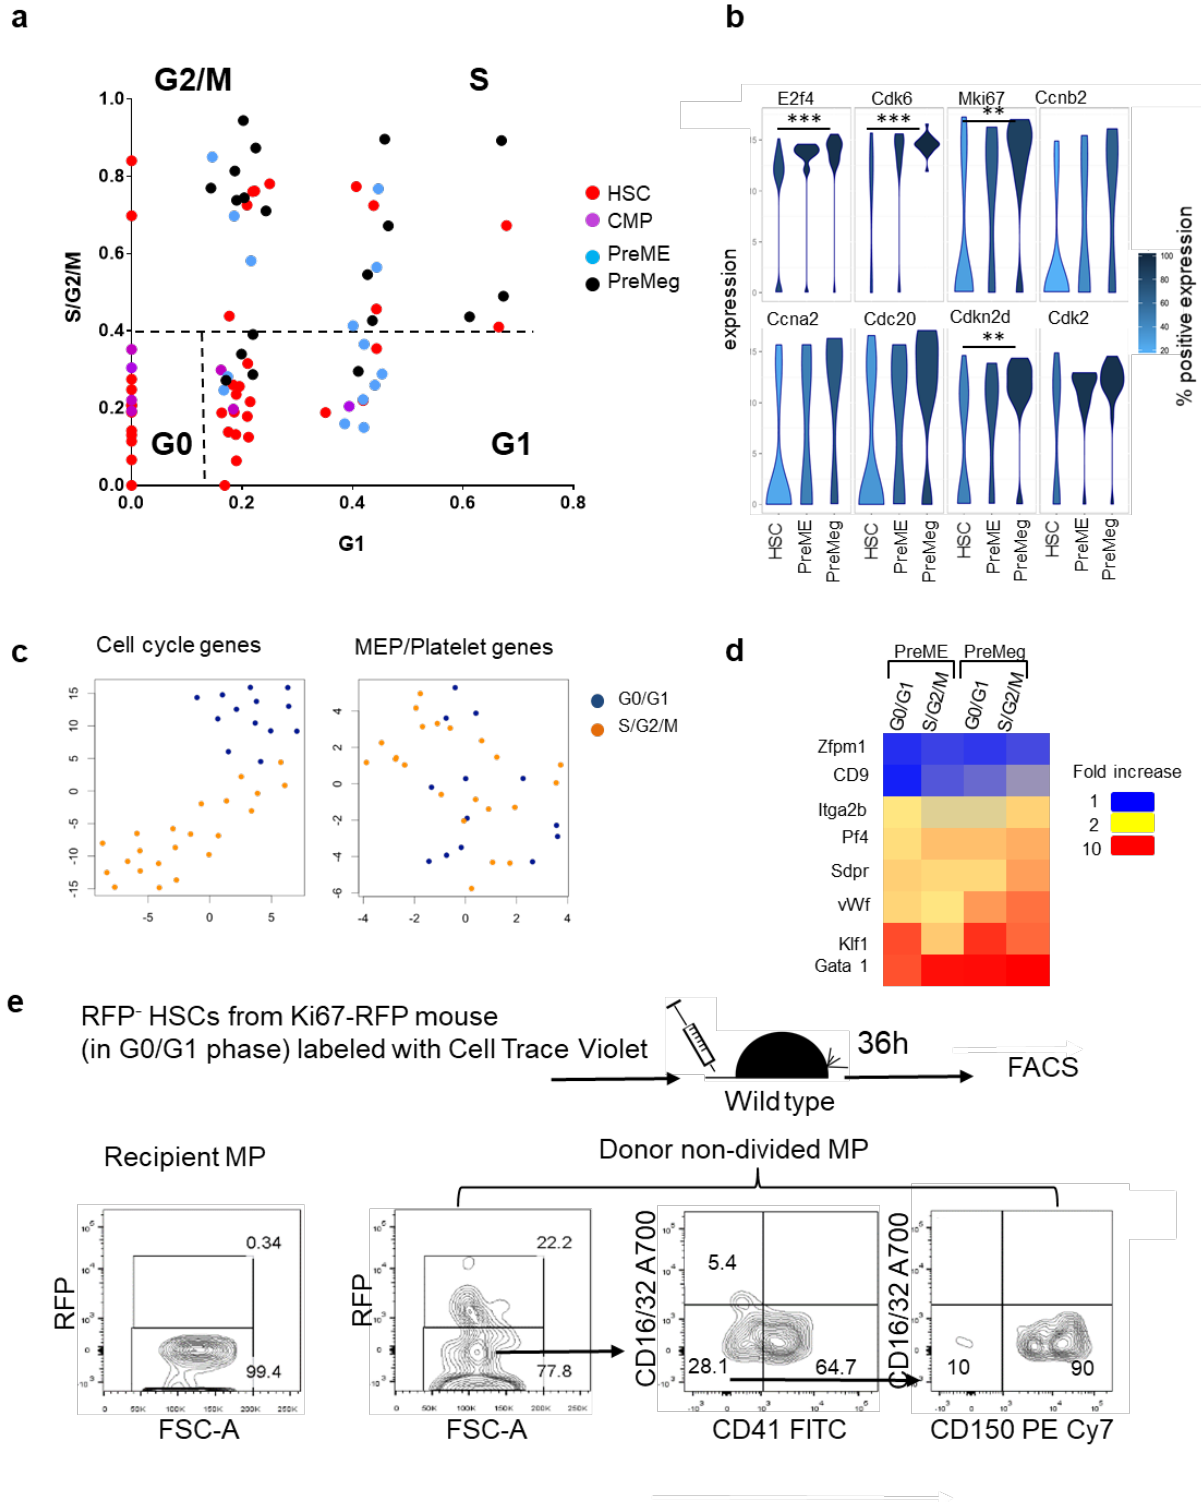

528

529 **Figure 4. Cell cycle distribution of undivided donor HSCs, CMPs, PreMEs, and PreMegs.**

530 **(a)** Prediction of cell cycle phases for all undivided donor cells 36h after transplantation. Shown is the  
531 average expression of G1 genes (x-axis) and S/G2/M genes (y-axes) **(b)** Violin density plots for the most  
532 differently expressed cell cycle genes. Y-axis represents gene expression. The horizontal width of the plot  
533 shows the density of the data along the Y-axis. Statistical significance was determined using the Hurdle  
534 model. \*( $p < 0.05$ ), \*\*( $p < 0.01$ ), \*\*\*( $p < 0.0001$ ). Exact P value in supplemental Tables 2-3. **(c)** t-SNE plots  
535 for PreME/ PreMeg cells based on cell cycle genes and MEP/Platelet genes. **(d)** Mean expression of  
536 MEP/Platelet genes was calculated for HSCs, PreMEs and PreMegs in G0/G1 and S/G2/M phases and is  
537 depicted as fold-increase relative to mean expression in HSCs in the G0/G1 phases. **(e)** RFP expression in  
538 undivided donor MPs at 36h after transplantation of RFP<sup>+</sup> HSCs from Ki67<sup>RFP</sup> knock-in mice. Recipient  
539 MPs were used as negative controls for RFP expression. (Representative example, n=5, from 2  
540 independent experiments).

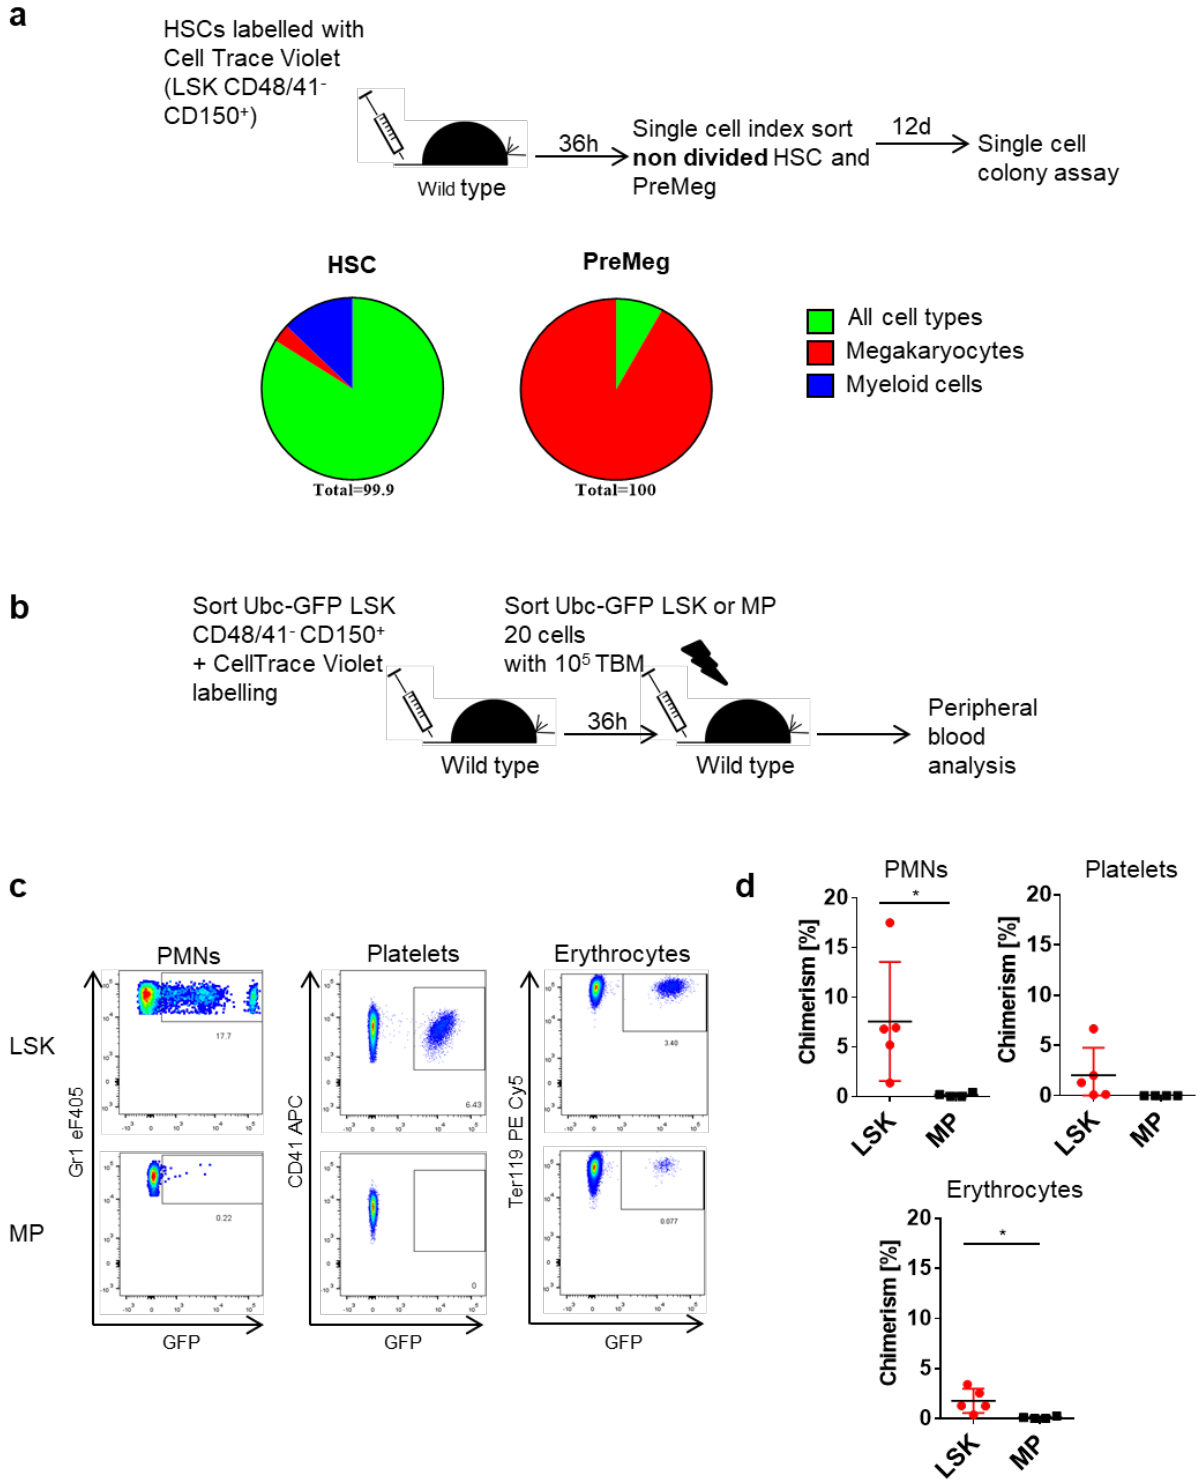

541

542 **Figure 5. Functional analysis of undivided donor HSCs and MPs.**

543 **(a)** Individual undivided donor HSCs (LSK CD48<sup>-</sup> CD150<sup>+</sup>) and PreMeg (Lin<sup>-</sup> Sca-1<sup>-</sup> Kit<sup>+</sup> CD41<sup>+</sup>  
544 CD150<sup>+</sup> CD16/32<sup>-</sup>) cells were sorted 36h after transplantation and cultivated in liquid culture media  
545 supplemented with mSCF, mTPO, mIl3 and hEpo. Cell composition was analyzed after 12 days using  
546 May-Grunwald-Giemsa staining. Colonies (n=31) for HSCs and (n=25) PreMegs, 3 independent  
547 experiments, 15 mice. 82% HSCs generated colonies (more than 20 cells) and 79% PreMegs generated  
548 more than 3 megakaryocytes. **(b)** Reconstitution experiment using Ubc-GFP mice. **(c)** Peripheral blood  
549 analysis at 3 weeks after secondary transplantation into lethally irradiated recipients. Donor cell  
550 contribution to peripheral blood neutrophils (PMNs) CD11b<sup>+</sup> Gr1<sup>+</sup>, platelets Ter119<sup>-</sup> CD41<sup>+</sup>, and  
551 erythrocytes Ter119<sup>+</sup>. Representative plots and pictures from 2 independent experiments (n=5). We  
552 checked the mice every 3-4 weeks for a period of 16 weeks after transplantation, but did not find any  
553 repopulation from MPs. **(d)** Quantification of peripheral blood analysis from 2 independent experiments,  
554 n=5. Statistical significance was determined using unpaired Student's t-test \*(p<0.05). Data are means +/-  
555 S.D.  
556
